# Supplementary material for: The rate of euploid miscarriage is increased in the setting of adenomyosis
Source: PubMed Central journal article supplement — Hum Reprod Open. 2018 Jul 4;2018(3):hoy011. doi: 10.1093/hropen/hoy011 (PMC6276689; doi:10.1093/hropen/hoy011), 2018-07-04
Supplement: hoy011supp_table2.pdf [file hoy011supp_table2.pdf]

**Supplementary Table SII Pregnancy outcomes.**

|                             | <b>Adenomyosis<br/>(n = 34)</b> | <b>No adenomyosis<br/>(n = 137)</b> | <b>P</b> |
|-----------------------------|---------------------------------|-------------------------------------|----------|
| Non-viable<br>(miscarriage) | 15 (44.1%)                      | 21 (15.3%)                          | <0.0006  |
| Viable singleton            | 19 (55.9%)                      | 107 (78.1%)                         |          |
| Viable twins                | 0 (0.0%)                        | 9 (6.6%)                            |          |
| Clinical miscarriage        | 3 (8.8%)                        | 6 (4.4%)                            |          |
| Live birth, n (%)           | 16 (47%)                        | 110 (80%)                           |          |

Live birth outcomes were compared via Fishers exact test.
