# Supplementary material for: The rate of euploid miscarriage is increased in the setting of adenomyosis
Source: PubMed Central journal article supplement — Hum Reprod Open. 2018 Jul 4;2018(3):hoy011. doi: 10.1093/hropen/hoy011 (PMC6276689; doi:10.1093/hropen/hoy011), 2018-07-04
Supplement: hoy011suppl_table1.pdf [file hoy011suppl_table1.pdf]

**Supplementary Table S1** Distribution of FET cycle protocols and hormonal levels in adenomyosis positive and negative groups.

| Type of FET cycle                     | Adenomyosis (n = 34)     | No Adenomyosis (n = 137) | <0.0001 |
|---------------------------------------|--------------------------|--------------------------|---------|
| 1 NO                                  | 4 (11.8%)                | 68 (49.6%)               |         |
| 2 NO + pregnyl luteal support/trigger | 2 (5.9%)                 | 26 (19.0%)               |         |
| 3 NO + progesterone luteal support    | 1 (2.9%)                 | 0 (0%)                   |         |
| 4 OI (clomid, letrozole, FSH OI)      | 15 (44.1%)               | 25 (18.2%)               |         |
| 5 Artificial                          | 12 (35.3%)               | 18 (13.1%)               |         |
| D16 $\beta$ hCG, IU                   | 478.1 $\pm$ 686 (n = 34) | 591 $\pm$ 543 (n = 137)  | 0.0127  |
| D16 Progesterone                      | 102.5 $\pm$ 112 (n = 33) | 89.1 $\pm$ 58 (n = 137)  | 0.1895  |

NO= natural, ovulatory; OI= ovulation induction.

D16  $\beta$ hCG and D16 Progesterone are presented as mean  $\pm$  SD, type of FET cycle was compared with Fishers exact test.
