# Supplementary material for: The rate of euploid miscarriage is increased in the setting of adenomyosis
Source: PubMed Central journal article supplement — Hum Reprod Open. 2018 Jul 4;2018(3):hoy011. doi: 10.1093/hropen/hoy011 (PMC6276689; doi:10.1093/hropen/hoy011), 2018-07-04
Supplement: hoy011suppl_table3.pdf [file hoy011suppl_table3.pdf]

**Supplementary Table SIII** Standardized direct effects, indirect effects and total effects of BMI and adenomyosis on miscarriage.

|                                | Direct effect |         | Indirect effects |         | Total effect  |         |
|--------------------------------|---------------|---------|------------------|---------|---------------|---------|
|                                | $\beta$ (SE)  | P-value | $\beta$ (SE)     | P-value | $\beta$ (SE)  | P-value |
| BMI                            | 0.134 (0.084) | 0.11    | 0.183 (0.049)    | <0.001  | 0.317 (0.088) | <0.001  |
| Separate indirect effects      |               |         |                  |         |               |         |
| via Ln $\beta$ hCG             |               |         | 0.141 (0.044)    | 0.001   |               |         |
| via Adenomyosis                |               |         | 0.029 (0.019)    | 0.126   |               |         |
| via Adenomyosis/Ln $\beta$ hCG |               |         | 0.012 (0.009)    | 0.163   |               |         |
| Adenomyosis                    | 0.211 (0.077) | 0.033   | 0.089 (0.042)    | 0.033   | 0.300 (0.084) | <0.001  |
| Separate Indirect effects      |               |         |                  |         |               |         |
| via Ln $\beta$ HCG             |               |         | 0.089 (0.042)    | 0.033   |               |         |

Ln  $\beta$ HCG=log transformed  $\beta$ hCG.
